# Supplementary material for: The Natural Unit Expression of Classical Gravity
Source: Preprints.org preprint supplement (doi:10.20944/preprints202212.0088.v2), 2023-05-09
Supplement: Supplementary file 1 [file supplementary]

## Sheet: GAMMA 1-2 TBL
			CODATA values		Massive Body	Type	Mass	Mass	Radius	Radius
		lP	1.61626e-35				M⊙	kg	R⊙	m
		mP	2.17643e-08		Sagittarius A*	Supermassive BH	4154000	8.2601e+36		1.22682e+10		https://arxiv.org/abs/1904.05721
		tP	5.39125e-44		GRO J1655-40	Stellar mass BH	5.31	1.05588e+31		15682.2		https://arxiv.org/abs/1309.3652
		c	299792458		4U 1820−30	Neutron Star	1.58	3.14178e+30		9100		https://iopscience.iop.org/article/10.1088/0004-637X/719/2/1807
		G	6.6743e-11		Sirius B	White dwarf	1.034	2.05608e+30	0.0084	5.84771e+06		https://iopscience.iop.org/article/10.1086/305489
		h	6.62607e-34		Sun	Star	1	1.98847e+30		696156000		https://www.aanda.org/articles/aa/full_html/2018/08/aa32159-17/aa32159-17.html#:~:text=At%20607.1%20nm%2C%20the%20solar,value%20is%20%C2%B122%20km.
		ℏ	1.05457e-34		Earth	Planet		5.9723e+24		6371000		https://iau-a3.gitlab.io/NSFA/NSFA_cbe.html#EarthRadius2009
		Neutron mass	1.67493e-27
		Solar mass	1.98847e+30
		Solar radius	696156000
		std gravitational parameter	398600441800000
	The gravitational constant is equivalent to natural units in its unit dimensions
		Gravitational constant	Gravitational constant	Gravitational constant	Std. Uncertainty
				CODATA	CODATA
		m3/ kgs2	m3/ kgs2	m3/ kgs2
		6.6743e-11	6.6743e-11	6.6743e-11	1.5e-15
		1	1		6.67415e-11
					6.67445e-11
	Table 1 Stating the gravitational constant in natural units shows how the physical attributes of a system quantify gravitational phenomena in proportion to a Planck scale basis. Formula inputs are highlighted in red.
		Physical property	Symbol	Std Formula	Natural Unit Formula	Simple Formula		Earth	Earth	Earth
		Escape velocity						-11186.3	-11186.3	-11186.3
		Gravitational acceleration						-9.82047	-9.82047	-9.82047
		Gravitational potential energy						-1.04794e-19	-1.04794e-19	-1.04794e-19
		Gravitational force						1.64486e-26	1.64486e-26	1.64486e-26
	The speed of light is a one-to-one relationship between a natural unit of length and time
		Speed of Light	Speed of Light
		CODATA
		m/s	m/s
		299792458	2.99792e+08
	If the meter had been defined as twice its present value…				…the universal constants would change…			…but the formulas would stay the same
		Adjusted Planck Length		Adjusted speed of light	Adjusted gravitational constant	Adjusted Planck constant		Adjusted Earth radius	Adjusted Earth Schwarzschild radius	Adjusted Earth escape velocity
		m'		m' / s	m'3 / kg s2	m'2 kg / s		m'	m'	m' / s
		8.08128e-36		1.49896e+08	8.34287e-12	2.63643e-35		3185500	0.00443513	-5593.13
		Table 2 The inversely proportional relationship between Compton wavelength and rest mass gives a conserved constant of Planck length times mass. Compton wavelength and rest mass are equivalent proportions of the Planck scale allowing formulas to determine wavelength from mass and mass from wavelength.
		Particle	Compton wavelength	Rest mass	—	—	—	—		Compton wavelength	Rest mass
			CODATA	CODATA
			m	kg	—	—	—	—		m	kg
		e	3.86159e-13	9.10938e-31	3.51767e-43	3.51767e-43	4.18546e-23	4.18546e-23		3.86159e-13	9.10938e-31
		µ	1.86759e-15	1.88353e-28	3.51767e-43	3.51767e-43	8.65421e-21	8.65421e-21		1.86759e-15	1.88353e-28
		τ	1.11054e-16	3.16754e-27	3.51767e-43	3.51767e-43	1.45538e-19	1.45538e-19		1.11054e-16	3.16754e-27
		ƛC m0	3.51767e-43
		lP mP	3.51767e-43
		ƛC m0 c	1.05457e-34
		ℏ	1.05457e-34
	Table 3 The ratio between a massive body's radial density and the radial density limit in the last column quantifies its gravitational field. The table compares the relative radial densities of different types of massive bodies. The Schwarzschild radius is defined by a density of 0.50
		Massive Body	Type
				dimensionless	dimensionless	dimensionless
		Sagittarius A*	Supermassive BH	1.31744e-45	3.79525e+44	0.5
		GRO J1655-40	Stellar mass BH	1.03063e-39	4.85141e+38	0.5
		4U 1820−30	Neutron Star	1.7761e-39	1.44355e+38	0.256389
		Sirius B	White dwarf	2.76391e-42	9.447e+37	0.000261107
		Sun	Star	2.32169e-44	9.13637e+37	2.12118e-06
		Earth	Planet	2.53689e-42	2.74408e+32	6.96143e-10
	Multiplying the Earth's radius by its radial density ratio gives one-half of the Schwarzschild radius.
		Earth Radius	Radial Density Ratio	One-half Schwarzschild radius	One-half Schwarzschild radius
		m	—	m	m
		6371000	6.96143e-10	0.00443513	0.00443503
	Gravitational potentials are quantified in relation to the ratio of Planck length to Planck mass, creating an important physical constant
		Radial density limit
		m / kg
		7.42616e-28
	Table 4 A summary of certain formulas for calculating classical gravitational potentials. Formulas are written in 1) the standard form using the gravitational constant, 2) natural units of length, mass, and time, 3) a radial index form using the ratio of a body's Schwarzschild radius to distance $r$, and 4) a simple form that abbreviates natural units with the speed of light. The formulas in each…
		Physical property	Symbol	Standard Formula	Natural units	Radial Index	Simple		Earth	Earth	Earth	Earth
		Schwarzschild Radius				—			0.00887025	0.5	—	0.00887025
		Escape velocity							-11186.3	-11186.3	-11186.3	-11186.3
		Gravitational acceleration							-9.82047	-9.82047	-9.82046	-9.82047
		Gravitational potential energy							-1.04794e-19	-1.04794e-19	-1.04794e-19	-1.04794e-19
		Gravitational force							1.64486e-26	1.64486e-26	1.64486e-26	1.64486e-26
		Gravitational binding energy							-2.24198e+32	-2.24198e+32	-2.24198e+32	-2.24198e+32
		Hawking radiation (energy)							2.83629e-25	2.83629e-25	2.83629e-25	2.83629e-25
